# Supplementary material for: Detailed methylation map of LINE‐1 5′‐promoter region reveals hypomethylated CpG hotspots associated with tumor tissue specificity
Source: PubMed Central journal article supplement (PMC6503062; doi:10.1002/mgg3.601), 2019-04-06

# Supplementary Figure 1

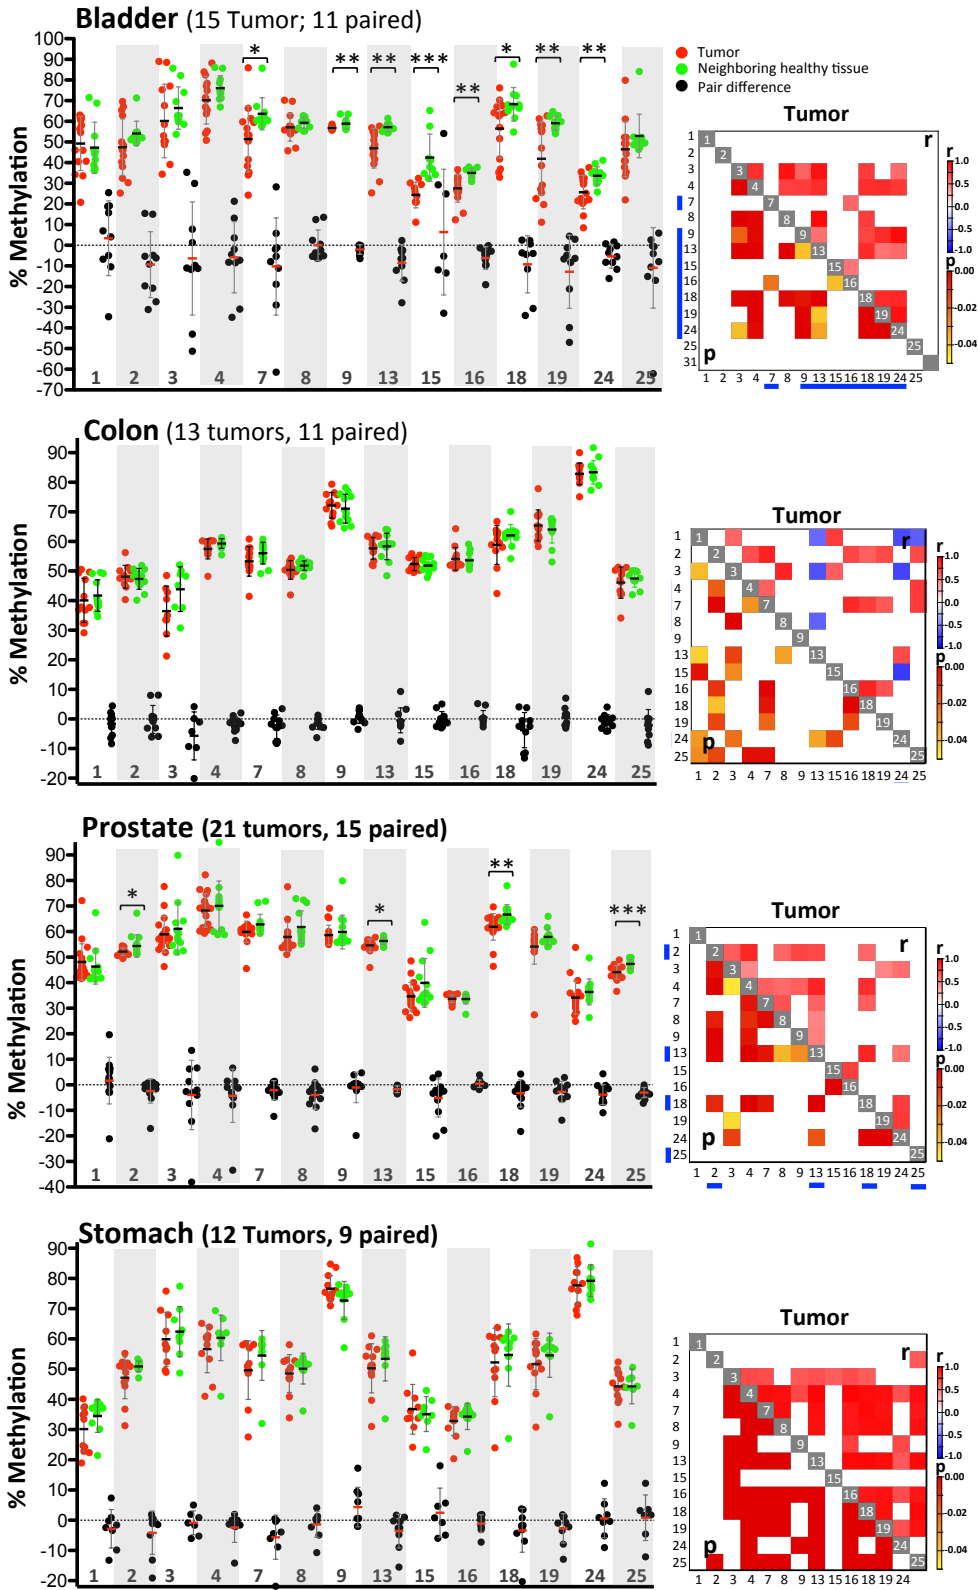



# Supplementary Figure 3

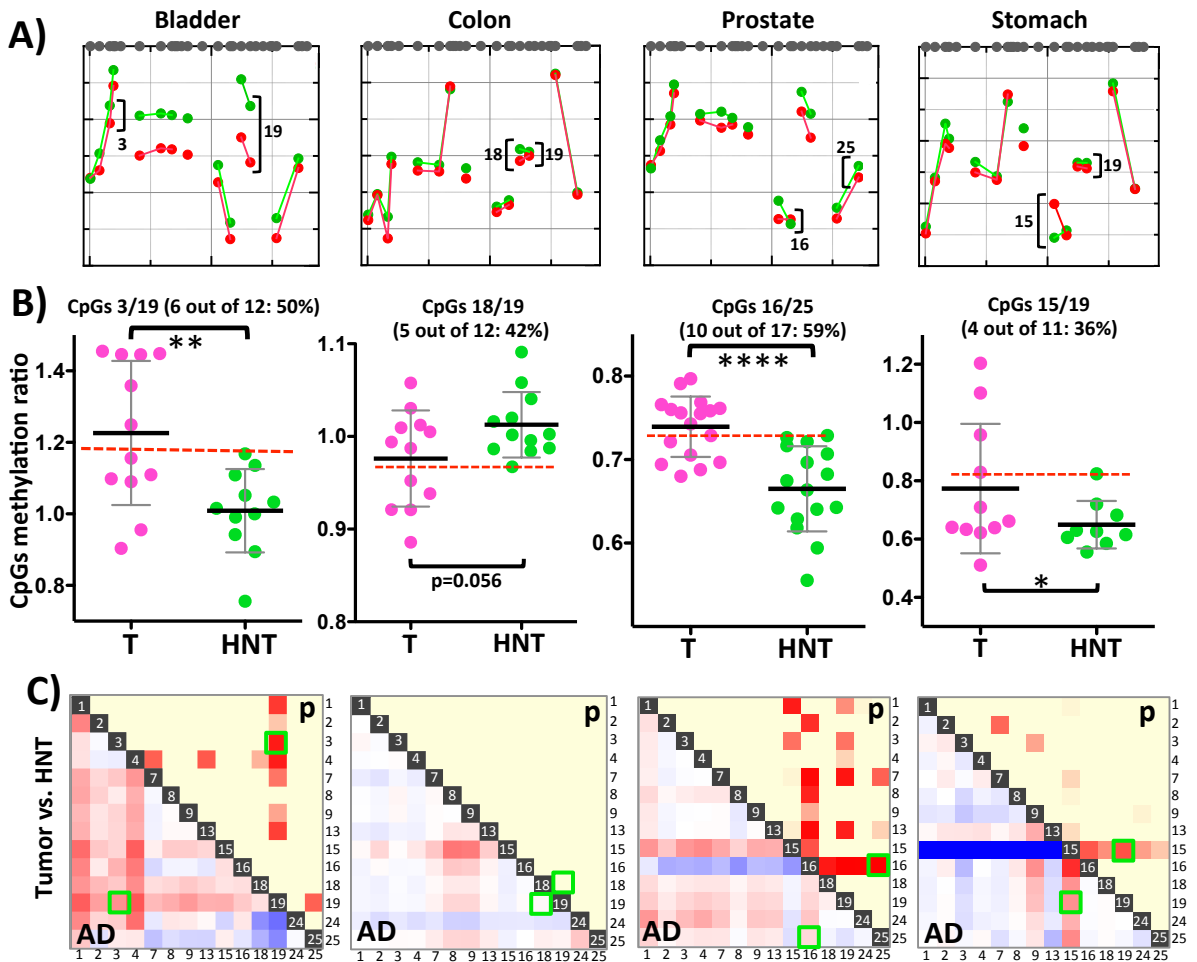

Supplement: MGG3-7-e601-s001.pdf [file MGG3-7-e601-s001.pdf]
